# Supplementary material
Source: PubMed Central journal article supplement (PMC6098738)

**Supplemental Table 1.** POR for Factors Associated with Urgent Need to Empty the Bowels among the U.S. Female Population from NHANES 2009-2010.

| Variables                             | POR  | [95% Conf. Interval] |      | P-value           |
|---------------------------------------|------|----------------------|------|-------------------|
| Age (continuous)                      | 1.01 | 0.99                 | 1.04 | 0.301             |
| <i>Ethnicity</i>                      |      |                      |      |                   |
| Caucasian                             | 0.44 | 0.15                 | 1.30 | 0.128             |
| African American                      | 0.87 | 0.41                 | 1.84 | 0.692             |
| Hispanics                             | 0.43 | 0.17                 | 1.08 | 0.07              |
| Higher education                      | 0.99 | 0.66                 | 1.49 | 0.953             |
| Living above poverty income           | 1.10 | 0.51                 | 2.38 | 0.789             |
| Obese BMI                             | 0.76 | 0.36                 | 1.59 | 0.443             |
| Feeling down, depressed, hopeless     | 1.22 | 0.38                 | 3.85 | 0.722             |
| Self-rated health (fair/poor)         | 2.82 | 1.41                 | 5.64 | <b>0.006</b>      |
| Urinary Urge incontinence             | 1.51 | 0.66                 | 3.44 | 0.304             |
| Heavy/moderate alcohol drinker        | 1.19 | 0.39                 | 3.60 | 0.74              |
| High caffeine intake                  | 1.35 | 0.43                 | 4.24 | 0.585             |
| Frequent milk drinker                 | 1.52 | 0.73                 | 3.19 | 0.248             |
| Highest quartile Fiber intake         | 0.47 | 0.18                 | 1.24 | 0.118             |
| Highest quartile Liquid intake        | 0.93 | 0.33                 | 2.59 | 0.884             |
| Highest quartile Carbohydrates intake | 1.61 | 0.41                 | 6.26 | 0.467             |
| Highest quartile Sugar intake         | 1.51 | 0.73                 | 3.11 | 0.243             |
| Highest quartile Protein intake       | 0.75 | 0.29                 | 1.97 | 0.542             |
| Highest quartile Fat intake           | 1.33 | 0.65                 | 2.69 | 0.409             |
| Diarrhea BSFS Stool 6 & 7             | 3.17 | 1.04                 | 9.61 | <b>0.043</b>      |
| Stool Frequency (continuous)          | 1.15 | 1.09                 | 1.21 | <b>&lt;0.0001</b> |
| Fecal Incontinence                    | 0.66 | 0.12                 | 3.72 | 0.614             |
| History of Hysterectomy/oophorectomy  | 0.88 | 0.32                 | 2.42 | 0.798             |
| Had Vaginal Delivery                  | 1.26 | 0.48                 | 3.34 | 0.615             |
| Had C-Section Delivery                | 1.38 | 0.77                 | 2.47 | 0.253             |

**Supplemental Table 2.** POR for Factors Associated with Urgent Need to Empty the Bowels among the U.S. Male Population from NHANES 2009-2010.

| Variables                                    | POR  | [95% Conf. Interval] |       | P-value      |
|----------------------------------------------|------|----------------------|-------|--------------|
| <b>Age (continuous)</b>                      | 1.04 | 1.01                 | 1.07  | <b>0.012</b> |
| <i>Ethnicity</i>                             |      |                      |       |              |
| <b>Caucasian</b>                             | 1.12 | 0.35                 | 3.62  | 0.842        |
| <b>African American</b>                      | 1.79 | 0.51                 | 6.27  | 0.338        |
| <b>Hispanics</b>                             | 1.50 | 0.54                 | 4.17  | 0.409        |
| <b>Higher education</b>                      | 1.05 | 0.31                 | 3.61  | 0.935        |
| <b>Living above poverty income</b>           | 0.59 | 0.22                 | 1.64  | 0.293        |
| <b>Obese BMI</b>                             | 2.21 | 0.99                 | 4.94  | 0.054        |
| <b>Feeling down, depressed, hopeless</b>     | 2.61 | 0.59                 | 11.57 | 0.191        |
| <b>Self-rated health (fair/poor)</b>         | 0.98 | 0.40                 | 2.40  | 0.957        |
| <b>Urinary Urge incontinence</b>             | 4.66 | 2.19                 | 9.94  | <b>0.001</b> |
| <b>Heavy/moderate alcohol drinker</b>        | 1.24 | 0.53                 | 2.92  | 0.602        |
| <b>High caffeine intake</b>                  | 2.49 | 0.66                 | 9.37  | 0.163        |
| <b>Frequent milk drinker</b>                 | 0.68 | 0.30                 | 1.53  | 0.328        |
| <b>Highest quartile Fiber intake</b>         | 0.75 | 0.27                 | 2.05  | 0.552        |
| <b>Highest quartile Liquid intake</b>        | 0.37 | 0.15                 | 0.92  | <b>0.034</b> |
| <b>Highest quartile Carbohydrates intake</b> | 1.55 | 0.62                 | 3.91  | 0.327        |
| <b>Highest quartile Sugar intake</b>         | 0.94 | 0.35                 | 2.53  | 0.889        |
| <b>Highest quartile Protein intake</b>       | 1.92 | 0.89                 | 4.12  | 0.091        |
| <b>Highest quartile Fat intake</b>           | 0.95 | 0.25                 | 3.59  | 0.930        |
| <b>Diarrhea BSFS Stool 6 &amp; 7</b>         | 3.52 | 1.69                 | 7.32  | <b>0.002</b> |
| <b>Stool Frequency (Continuous)</b>          | 1.13 | 1.06                 | 1.20  | <b>0.001</b> |
| <b>Fecal Incontinence</b>                    | 1.93 | 0.80                 | 4.65  | 0.133        |
| <b>Prostate Cancer</b>                       | 1.21 | 0.21                 | 6.97  | 0.820        |

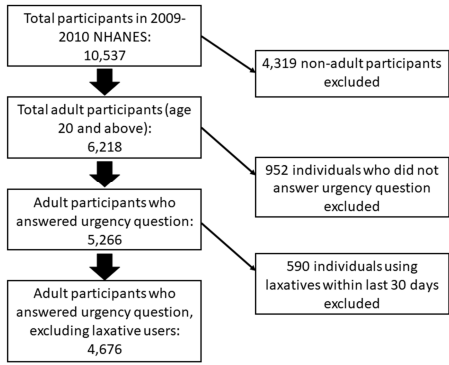

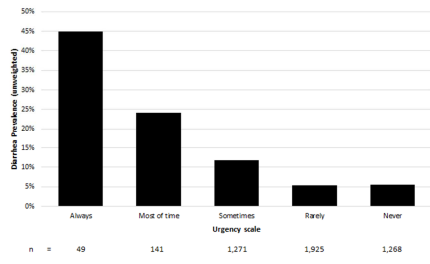

Supplement: NIHMS944817-supplement-supplement_1.pdf [file NIHMS944817-supplement-supplement_1.pdf]
